# Supplementary material
Source: PubMed Central journal article supplement (PMC3612363)
Supplement: NIHMS424376-supplement-Kinter_Sup_Figures.pdf [file NIHMS424376-supplement-Kinter_Sup_Figures.pdf]

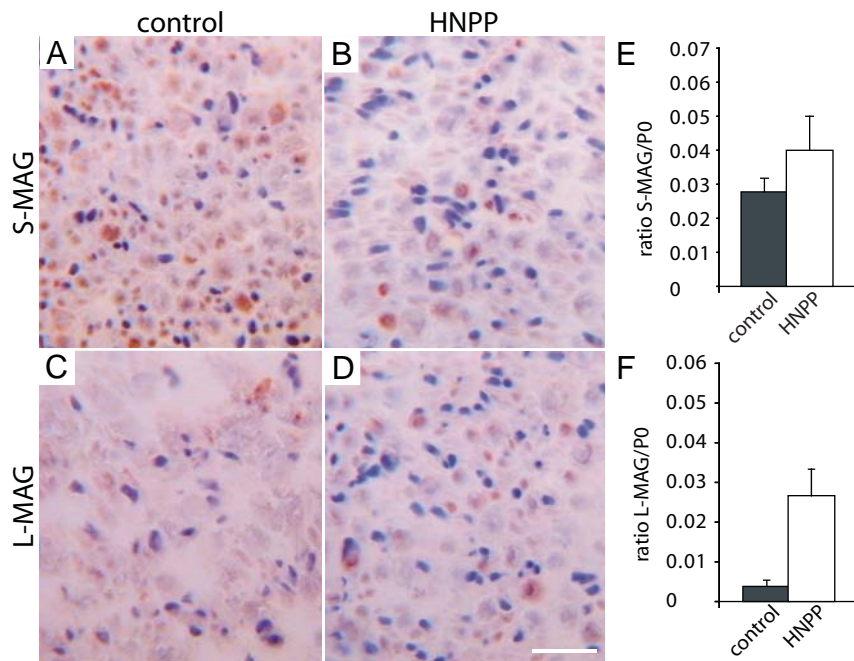

**G**

|                       |       | % MAG positive myelinated fibers | ratio MAG/P0    | ratio S-MAG/P0  | ratio L-MAG/P0  |
|-----------------------|-------|----------------------------------|-----------------|-----------------|-----------------|
| Control (S)           |       | 50%                              | 0.0774          | 0.0216          | 0.0029          |
| Control (U)           |       | 79%                              | 0.0454          | 0.0352          | 0.0065          |
| Control (X)           |       | 64%                              | 0.0212          | 0.0268          | 0.0015          |
| CMT1A (mi5)           |       | 92%                              | 0.1109          | 0.0409          | 0.0505          |
| CMT1A (mi6)           |       | 88%                              | 0.2124          | 0.0723          | 0.0468          |
| CMT1A (mi7)           |       | 87%                              | 0.6105          | 0.0533          | 0.0483          |
| HNPP (mi1)            |       | 84%                              | 0.1411          | 0.0232          | 0.0024          |
| HNPP (mi2)            |       | 15%                              | 0.0763          | 0.0117          | 0.0261          |
| HNPP (mi3)            |       | 61%                              | 0.2027          | 0.0685          | 0.0431          |
| HNPP (mi4)            |       | 86%                              | 0.3469          | 0.0410          | 0.0319          |
| HNPP (mi9)            |       | 90%                              | 0.1441          | 0.0548          | 0.0301          |
| <b>average values</b> |       |                                  |                 |                 |                 |
| Control               | (n=3) | 64%                              | 0.0480 (0.0163) | 0.0279 (0.0040) | 0.0036 (0.0015) |
| CMT1A                 | (n=3) | 89%                              | 0.3113 (0.1525) | 0.0555 (0.0091) | 0.0485 (0.0011) |
| HNPP                  | (n=5) | 67%                              | 0.1822 (0.0458) | 0.0398 (0.0103) | 0.0267 (0.0067) |

Supplementary Figure 1

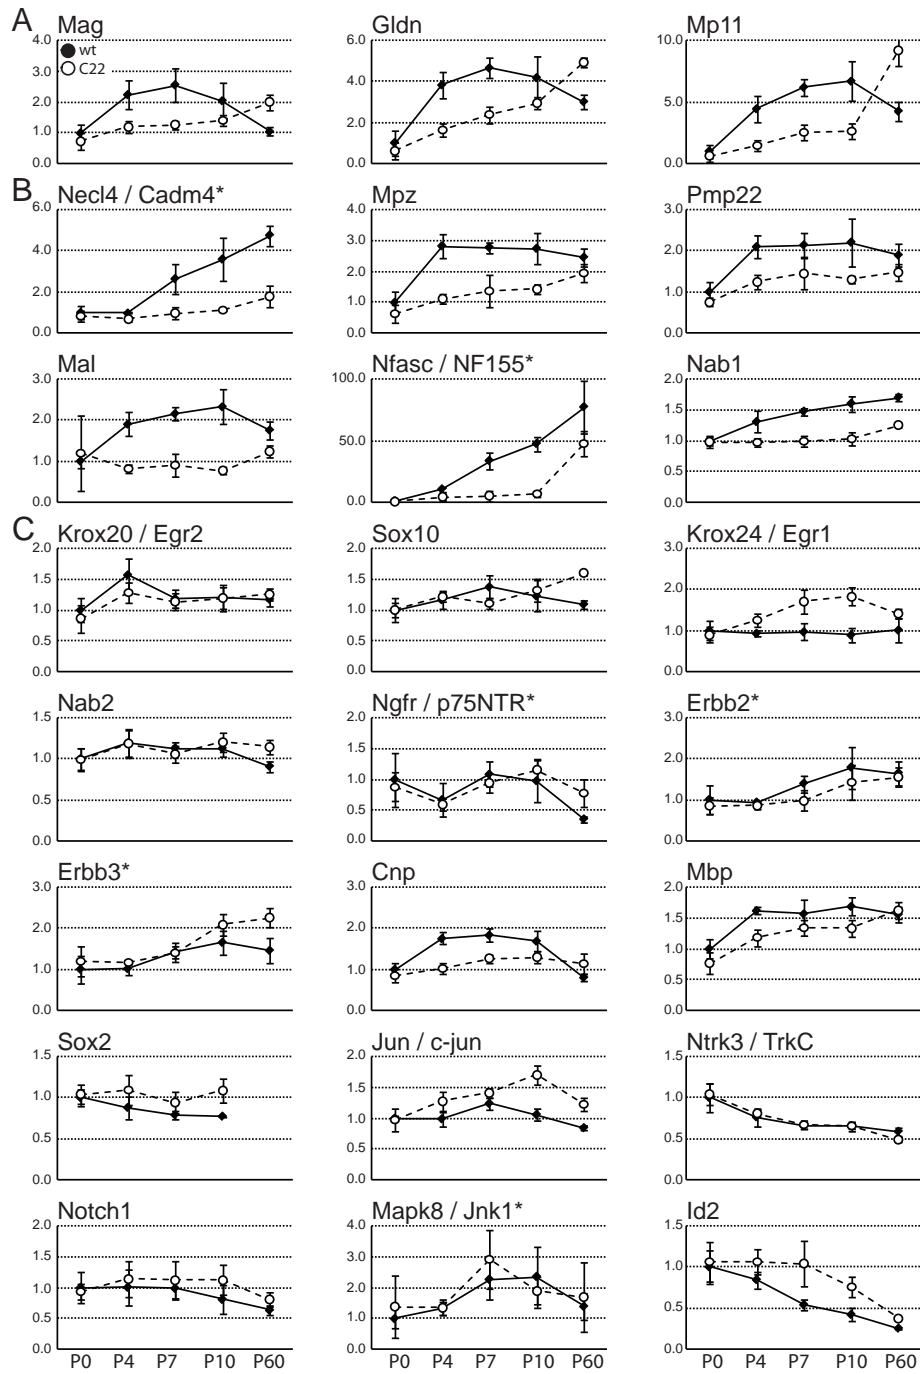

Supplementary Figure 2

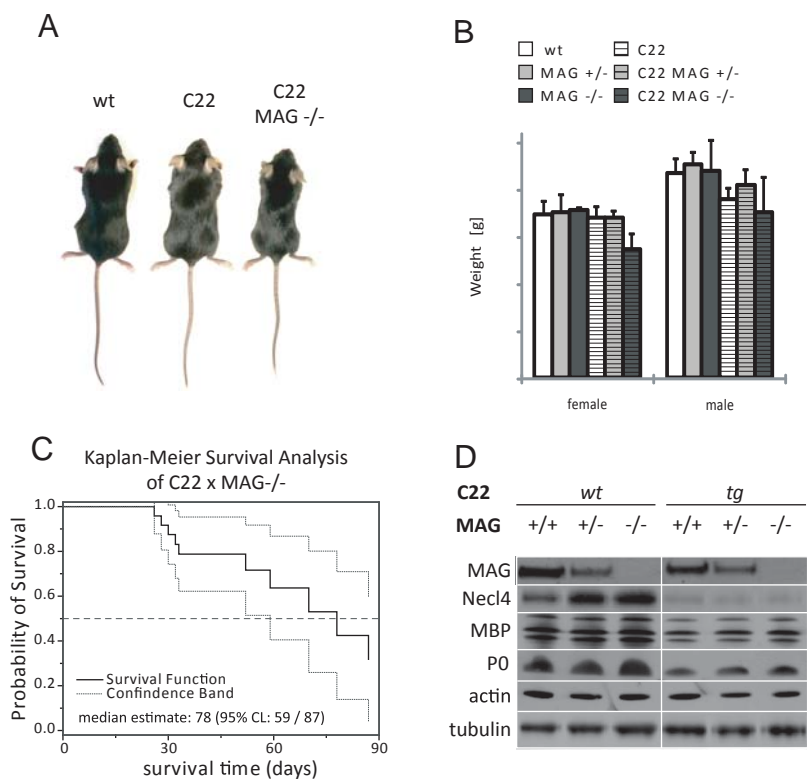

Supplementary Figure 3

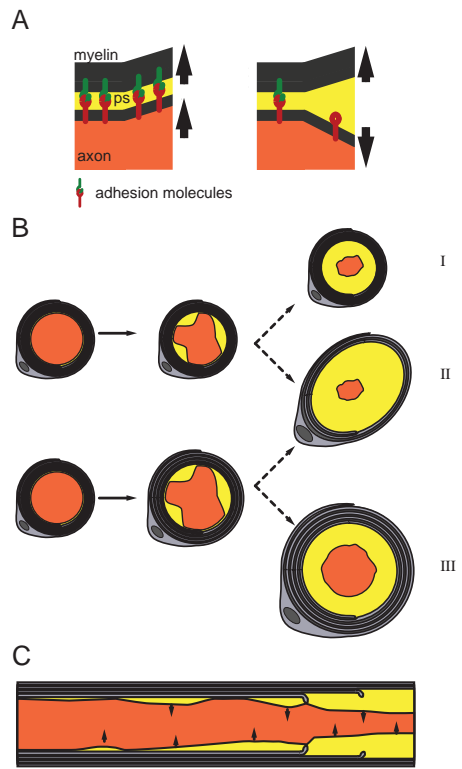

*Supplement Figure 4*
